# Supplementary material for: Control of the Cu ion species in Cu-SSZ-13 via the introduction of Co2+ co-cations to improve the NH3-SCR activity
Source: Royal Society of Chemistry journal article supplement (doi:10.1039/d1cy00623a), 2021-01-01
Supplement: d1cy00623a1.pdf [file d1cy00623a1.pdf]

## Supplementary Information

# **Control of the Cu ion species in Cu-SSZ-13 via the introduction of Co<sup>2+</sup> co-cations to improve the NH<sub>3</sub>-SCR activity**

Hwangho Lee,<sup>a</sup> Inhak Song,<sup>a</sup> Se Won Jeon,<sup>a</sup> and Do Heui Kim<sup>a\*</sup>

<sup>a</sup> *School of Chemical and Biological Engineering, Institute of Chemical Processes, Seoul National University, Seoul 08826, Republic of Korea.*

\* Corresponding author Email: [dohkim@snu.ac.kr](mailto:dohkim@snu.ac.kr)

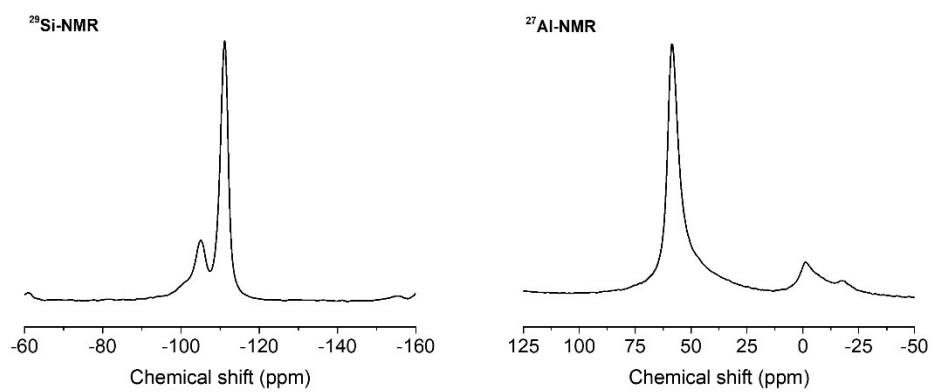

**Fig. S1**  $^{29}\text{Si-NMR}$  and  $^{27}\text{Al-NMR}$  spectra of H-SSZ-13.

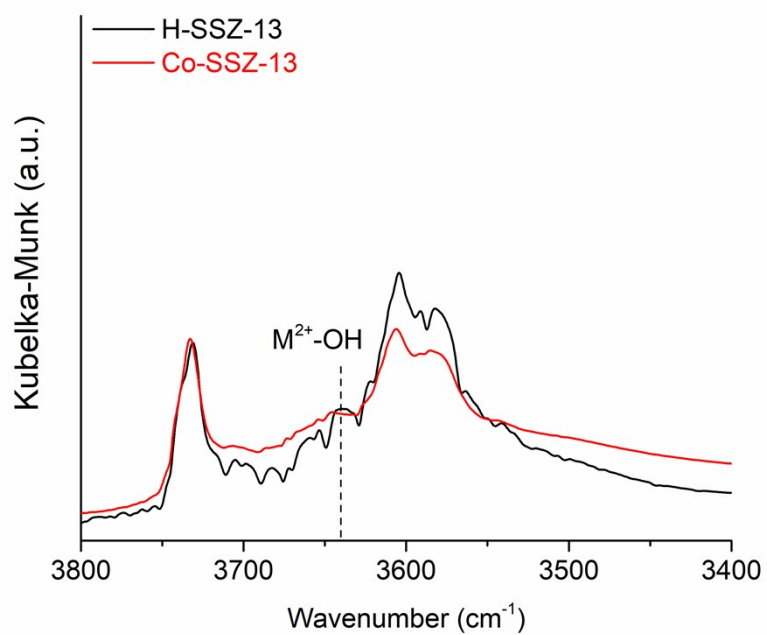

**Fig. S2** IR vibration peaks of hydroxyl group in the DRIFT spectra of H-SSZ-13 and Co-SSZ-13 at 200 °C.

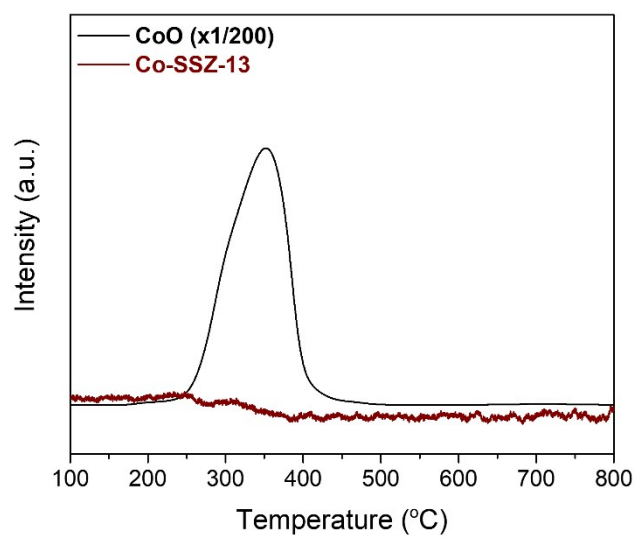

**Fig. S3** H<sub>2</sub>-TPR profiles of Co-SSZ-13 and CoO reference.

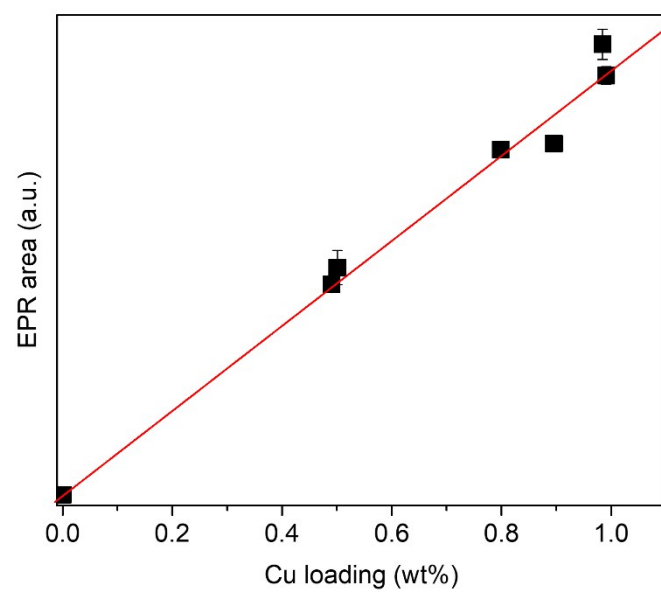

**Fig. S4** Correlation between area of EPR spectra and amount of Cu.

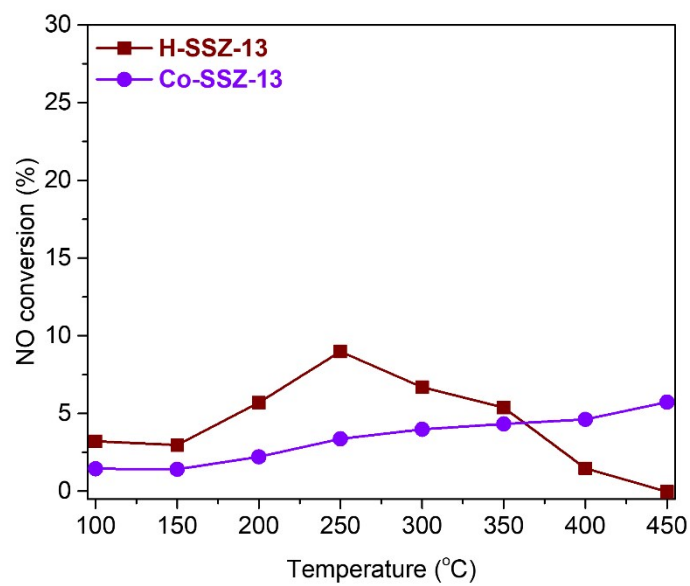

**Fig. S5** NO oxidation reactivity of H-SSZ-13 and Co-SSZ-13 under 500 ppm NO and 10% O<sub>2</sub> balance with N<sub>2</sub> GHSV: 120,000 h<sup>-1</sup>.

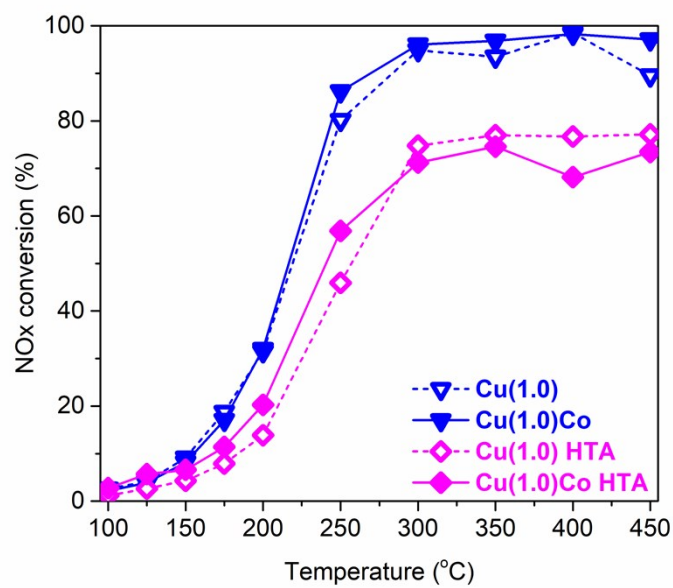

**Fig. S6** NO<sub>x</sub> conversion of HTA aged Cu(1.0) and Cu(1.0)Co catalysts. The catalysts were aged under air condition with 10% H<sub>2</sub>O at 850 °C for 16 h.

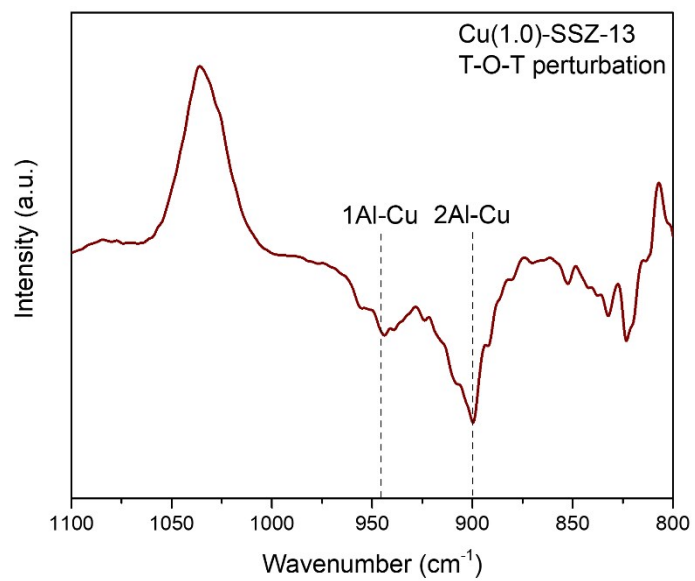

**Fig. S7** DRIFT spectra of T-O-T vibration at Cu(1.0)-SSZ-13 catalyst after NH<sub>3</sub> adsorption.



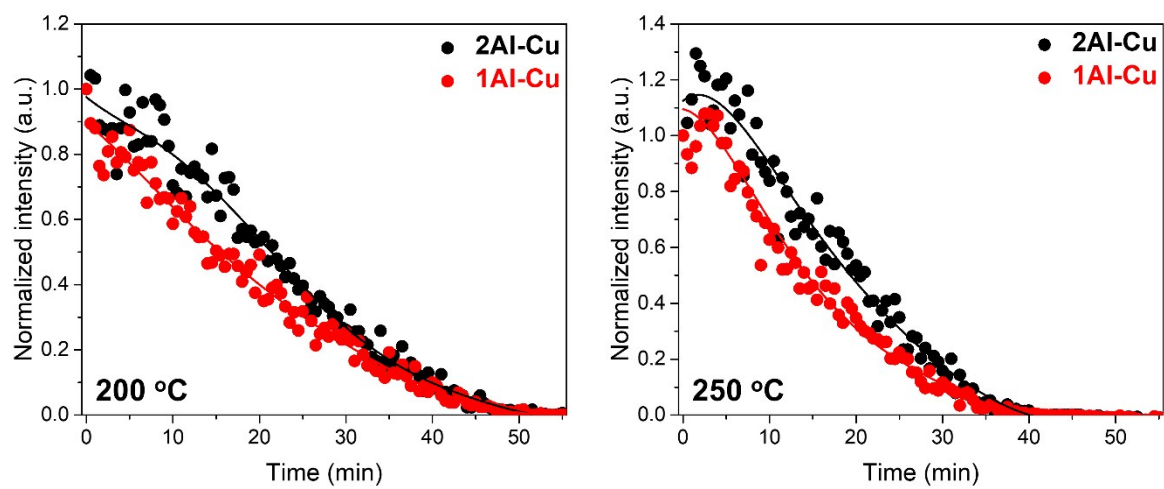

**Fig. S8** DRIFT spectra of T-O-T vibration of 1Al-Cu and 2Al-Cu species during the reaction of  $\text{NO} + \text{O}_2$  with pre-adsorbed  $\text{NH}_3$  on Cu(1.0) catalyst at 170, 200 and 250 °C.
